# Supplementary material
Source: PubMed Central journal article supplement (PMC4179633)
Supplement: me-14-1092.pdf [file me-14-1092.pdf]

**Table S1. Data on oligonucleotides**

| Primer               | Sequence of PCR Primers      |
|----------------------|------------------------------|
| Arg1                 |                              |
| forward              | 5'-AACACGGCAGTGGCTTTAACC-3'  |
| backward             | 5'-GGTTTTTCATCTGGCGCATTC-3'  |
| Cd11c                |                              |
| forward              | 5'-GCCAGAGAGACGTGCCAGTC-3'   |
| backward             | 5'-TGAGTGGGTCTGAGGGTGG-3'    |
| IL1 $\beta$          |                              |
| forward              | 5'-AAATACCTGTGGCCTTGGGC-3'   |
| backward             | 5'-CTTGGGATCCCACTCTCCAG-3'   |
| IL6                  |                              |
| forward              | 5'-AGAAGGAGTGGCTAAGGACCAA-3' |
| backward             | 5'-AACGCACTAGGTTTGCCGAG-3'   |
| IL10                 |                              |
| forward              | 5'-CATGGCCCAGAAATCAAGGA-3'   |
| backward             | 5'-GGAGAAATCGATGACAGCGC-3'   |
| iNOS                 |                              |
| forward              | 5'-CACAAGGCCACATCGGATTT-3'   |
| backward             | 5'-TCAATGGCATGAGGCAGGAG-3'   |
| MCP1 ( <i>Ccl2</i> ) |                              |
| forward              | 5'-GTCTGTGCTGACCCCAAGAAG-3'  |
| backward             | 5'-TGGTTCCGATCCAGGTTTTTA-3'  |
| $\beta$ -actin       |                              |
| forward              | 5'-CCTAAGGCCAACCGTGAAAA-3'   |
| backward             | 5'-GAGGCATACAGGGACAGCACA-3'  |
